# Supplementary material for: Quantitation and Identification of Intact Major Milk Proteins for High-Throughput LC-ESI-Q-TOF MS Analyses
Source: PubMed Central journal article supplement (PMC5066972; doi:10.1371/journal.pone.0163471), 2016-10-17
Supplement: pone.0163471.s002.pdf [file pone.0163471.s002.pdf]

Figure A . Optimisation of MS acquisition.

Vincent et al. 2016

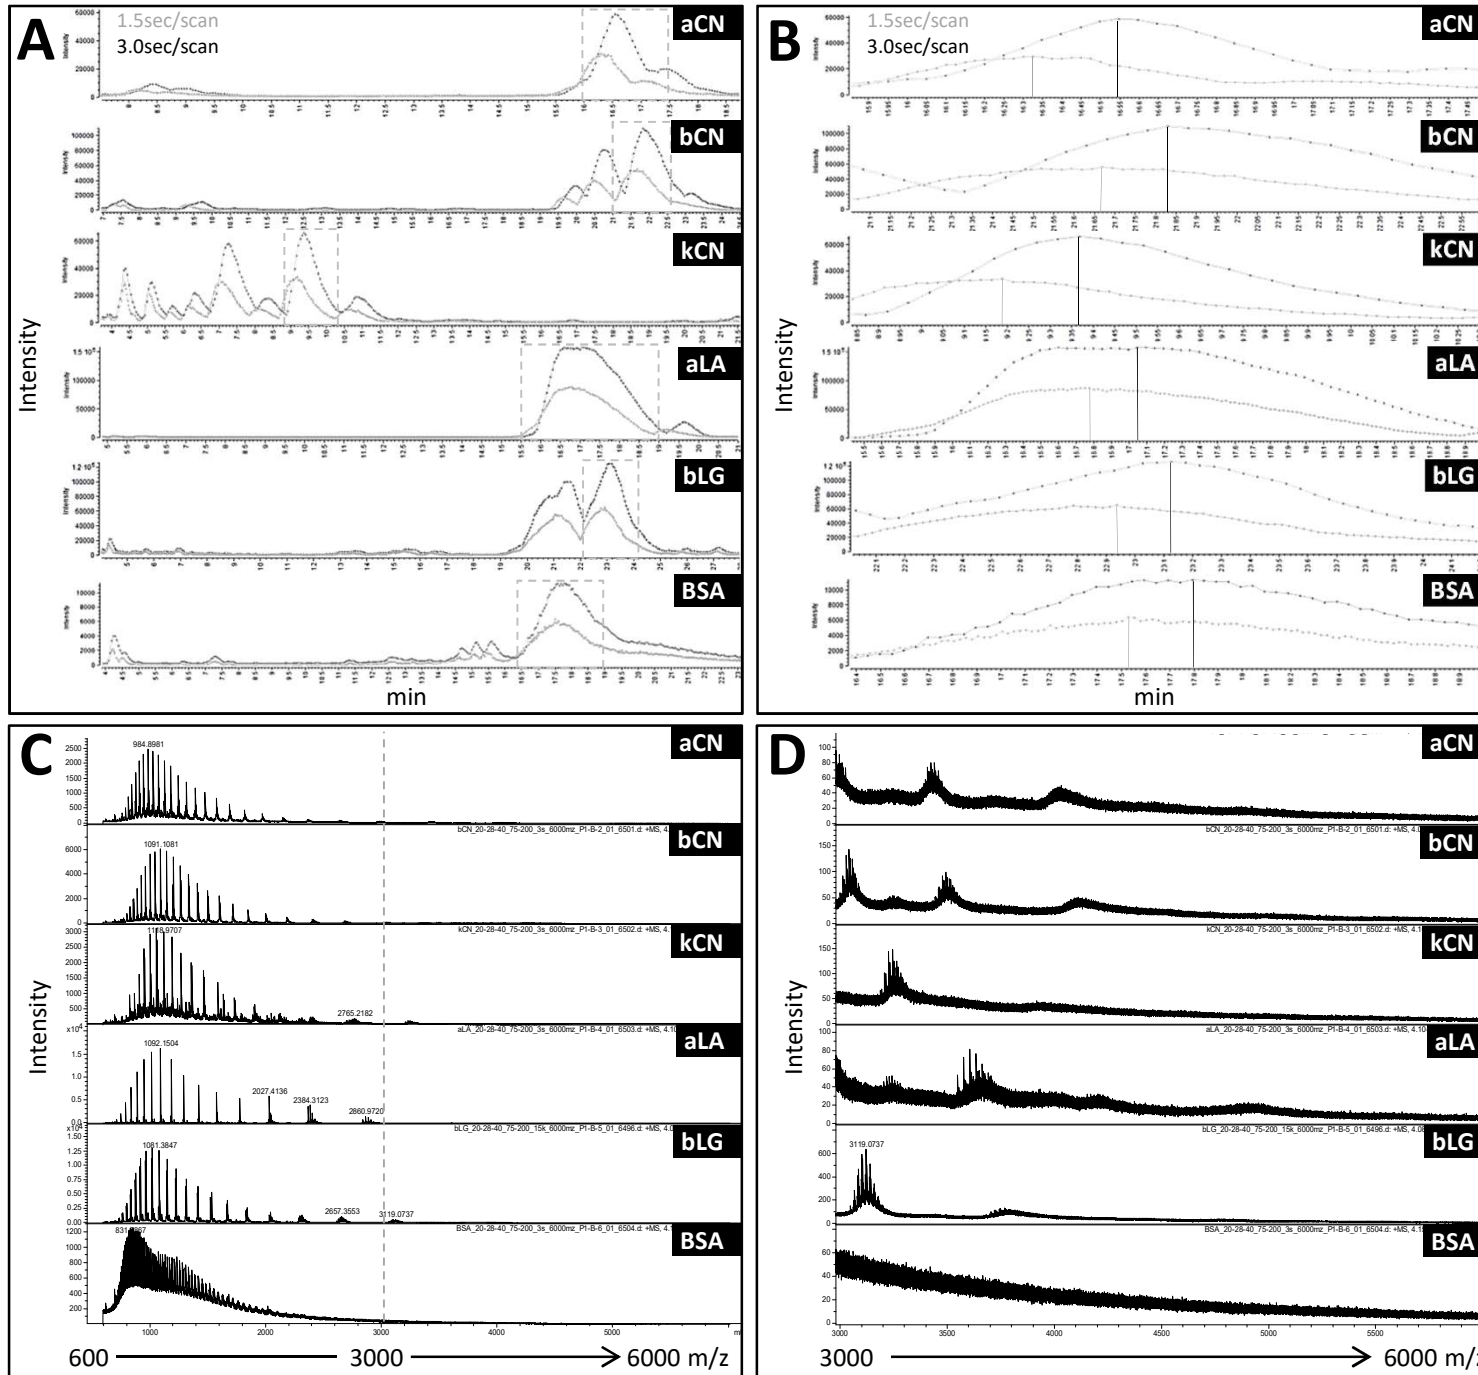

Scan rate (A-B) and mass range (C-D) were refined. BPCs on panel A are displayed for each standard from 5 to 24 min along the x axis; the most intense base peak per standard is boxed with a dotted line. This boxed area is zoomed in on panel B to further visualise individual data points. The whole BPCs displayed in panel A have been averaged across all peaks to produce the average spectra in panel C ranging from 600 to 6000 m/z; the dotted line marks 3000 m/z. The mass range 3000-6000 m/z is zoomed in on panel D to illustrate the lack of spectral peaks along this range.

**Figure B. (1/3)** Elution profile and spectral data for each protein of interest.

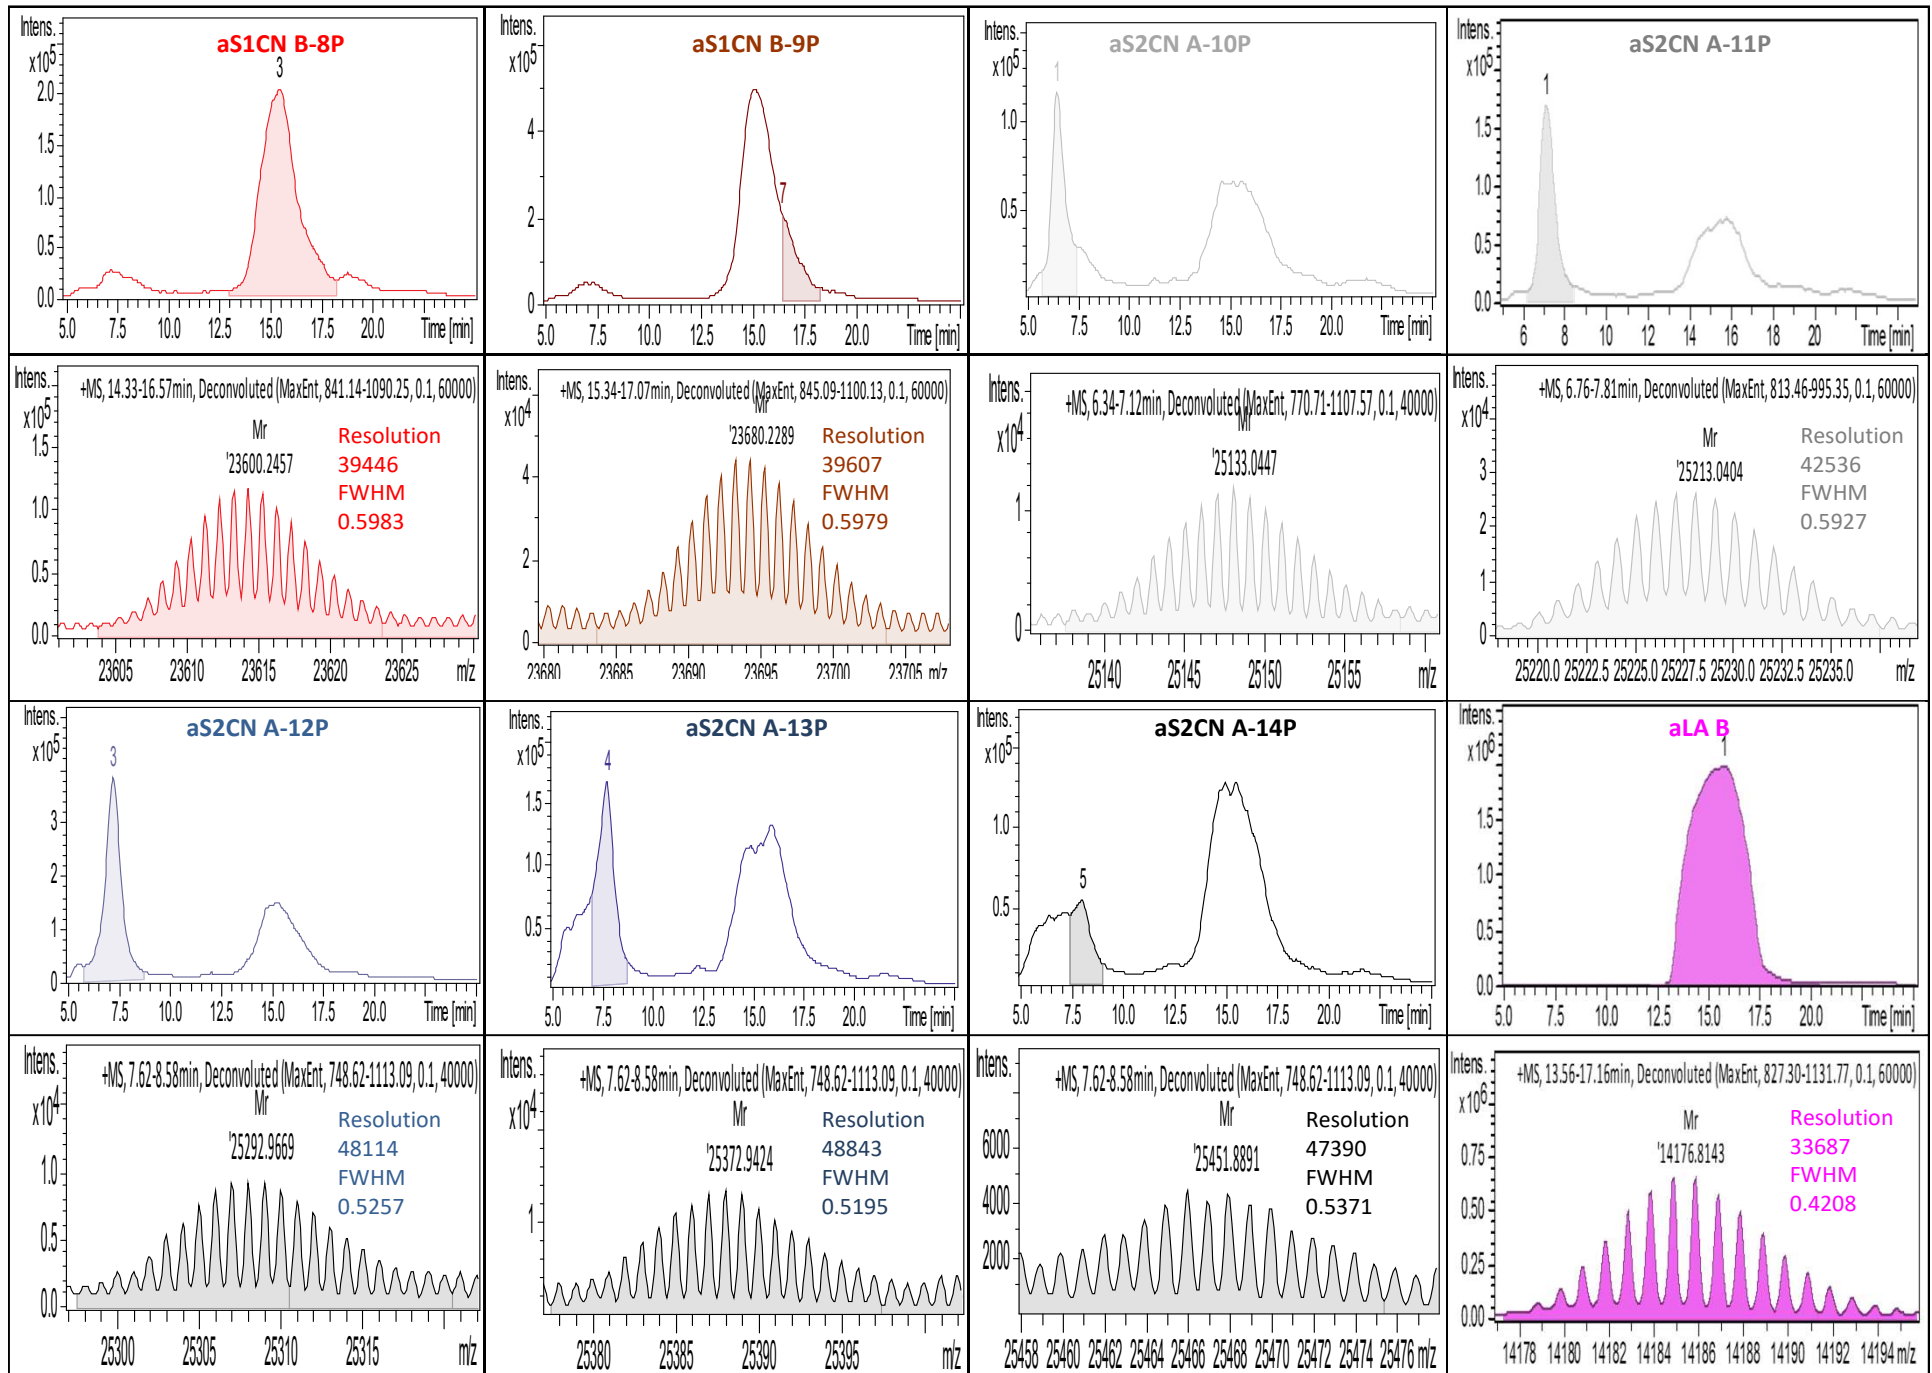

**Figure B. (2/3)** Elution profile and spectral data for each protein of interest.

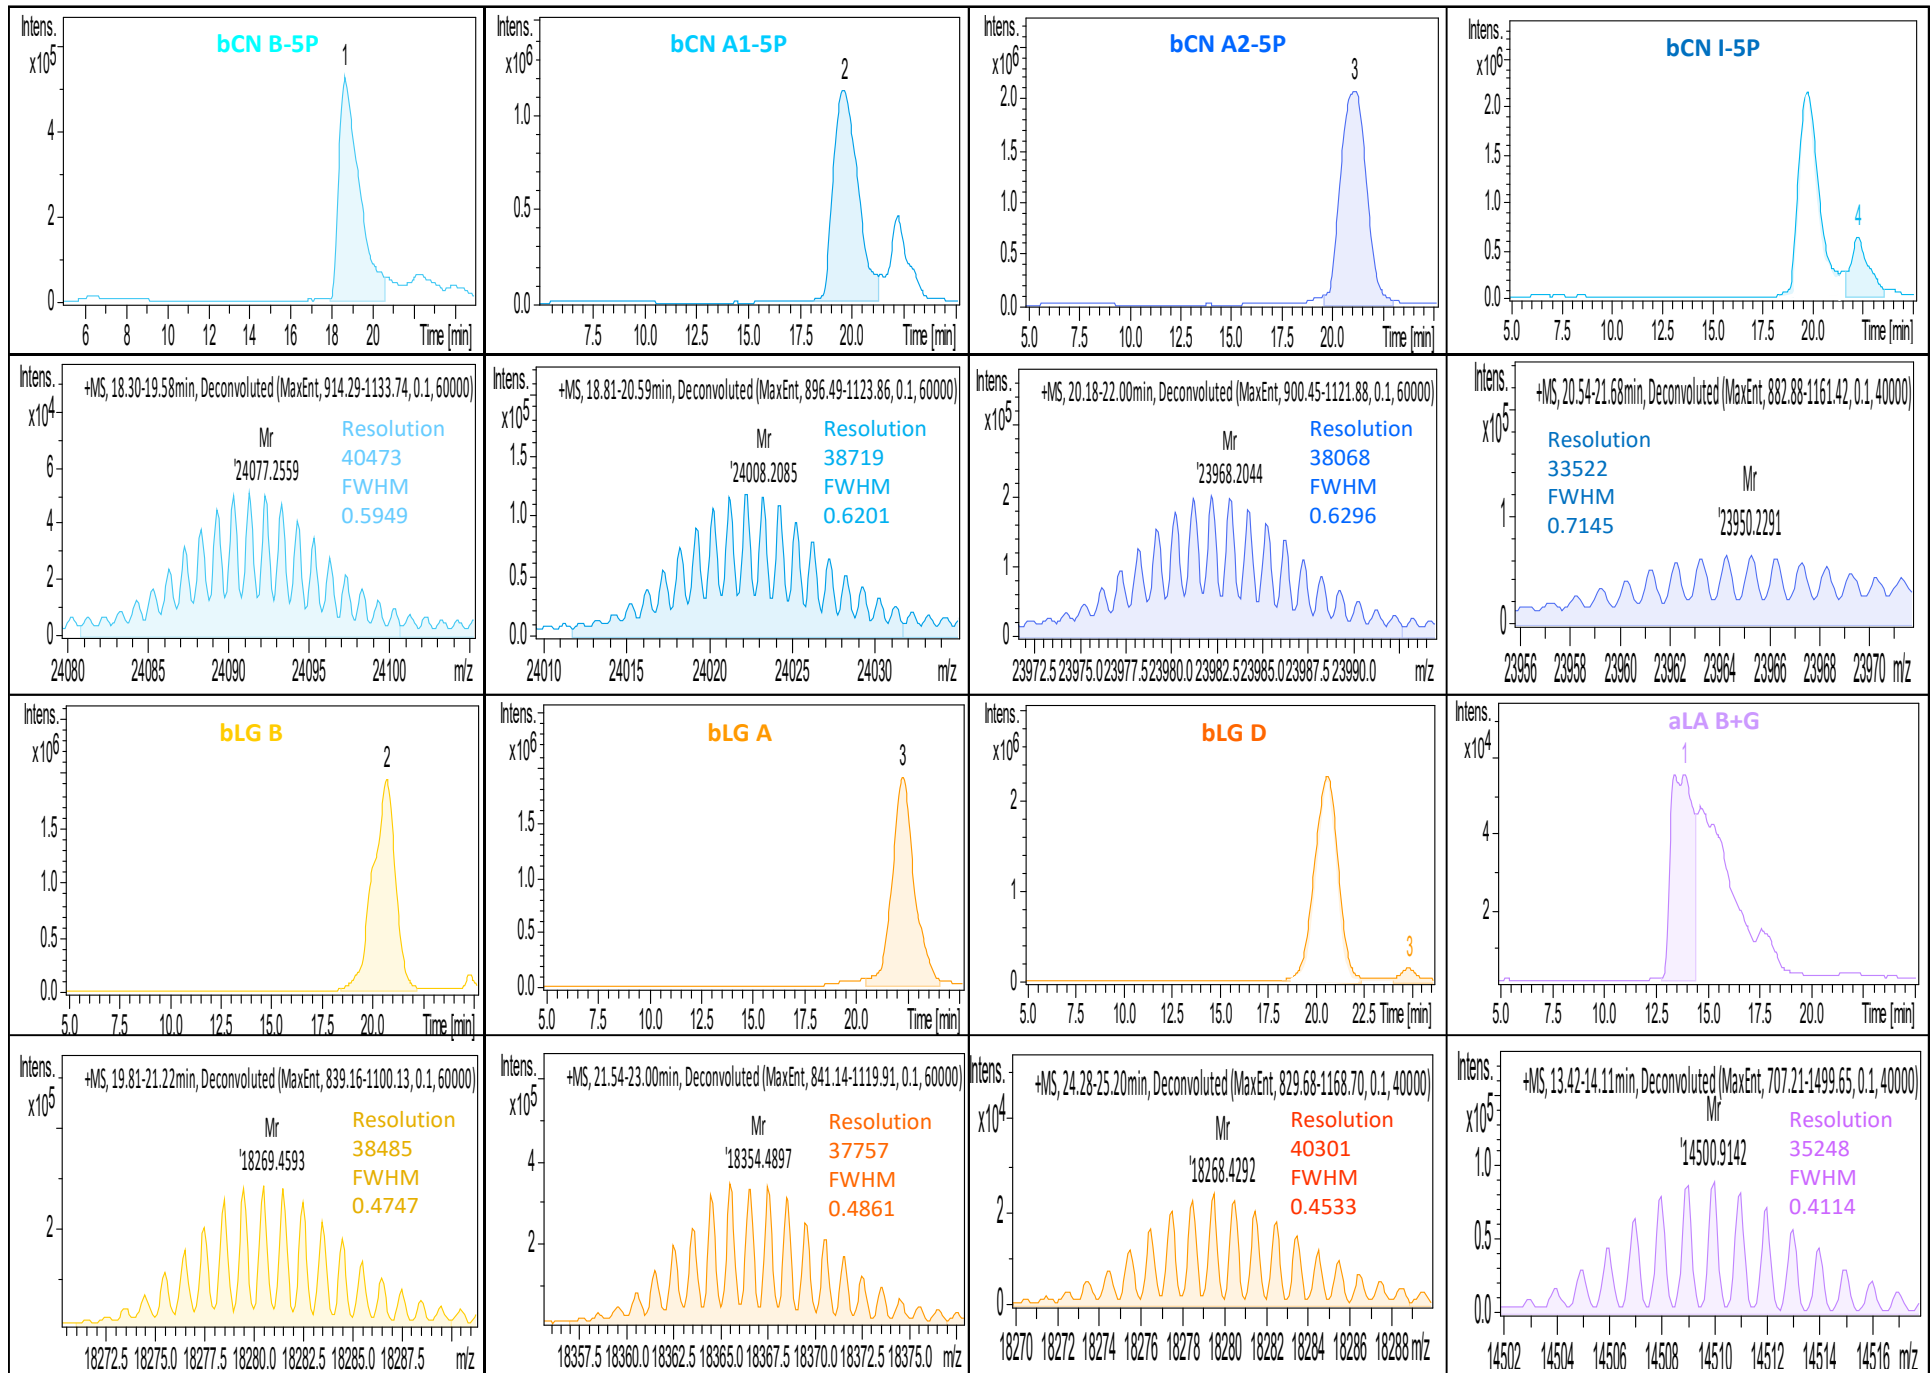

**Figure B. (3/3)** Elution profile and spectral data for each protein of interest.

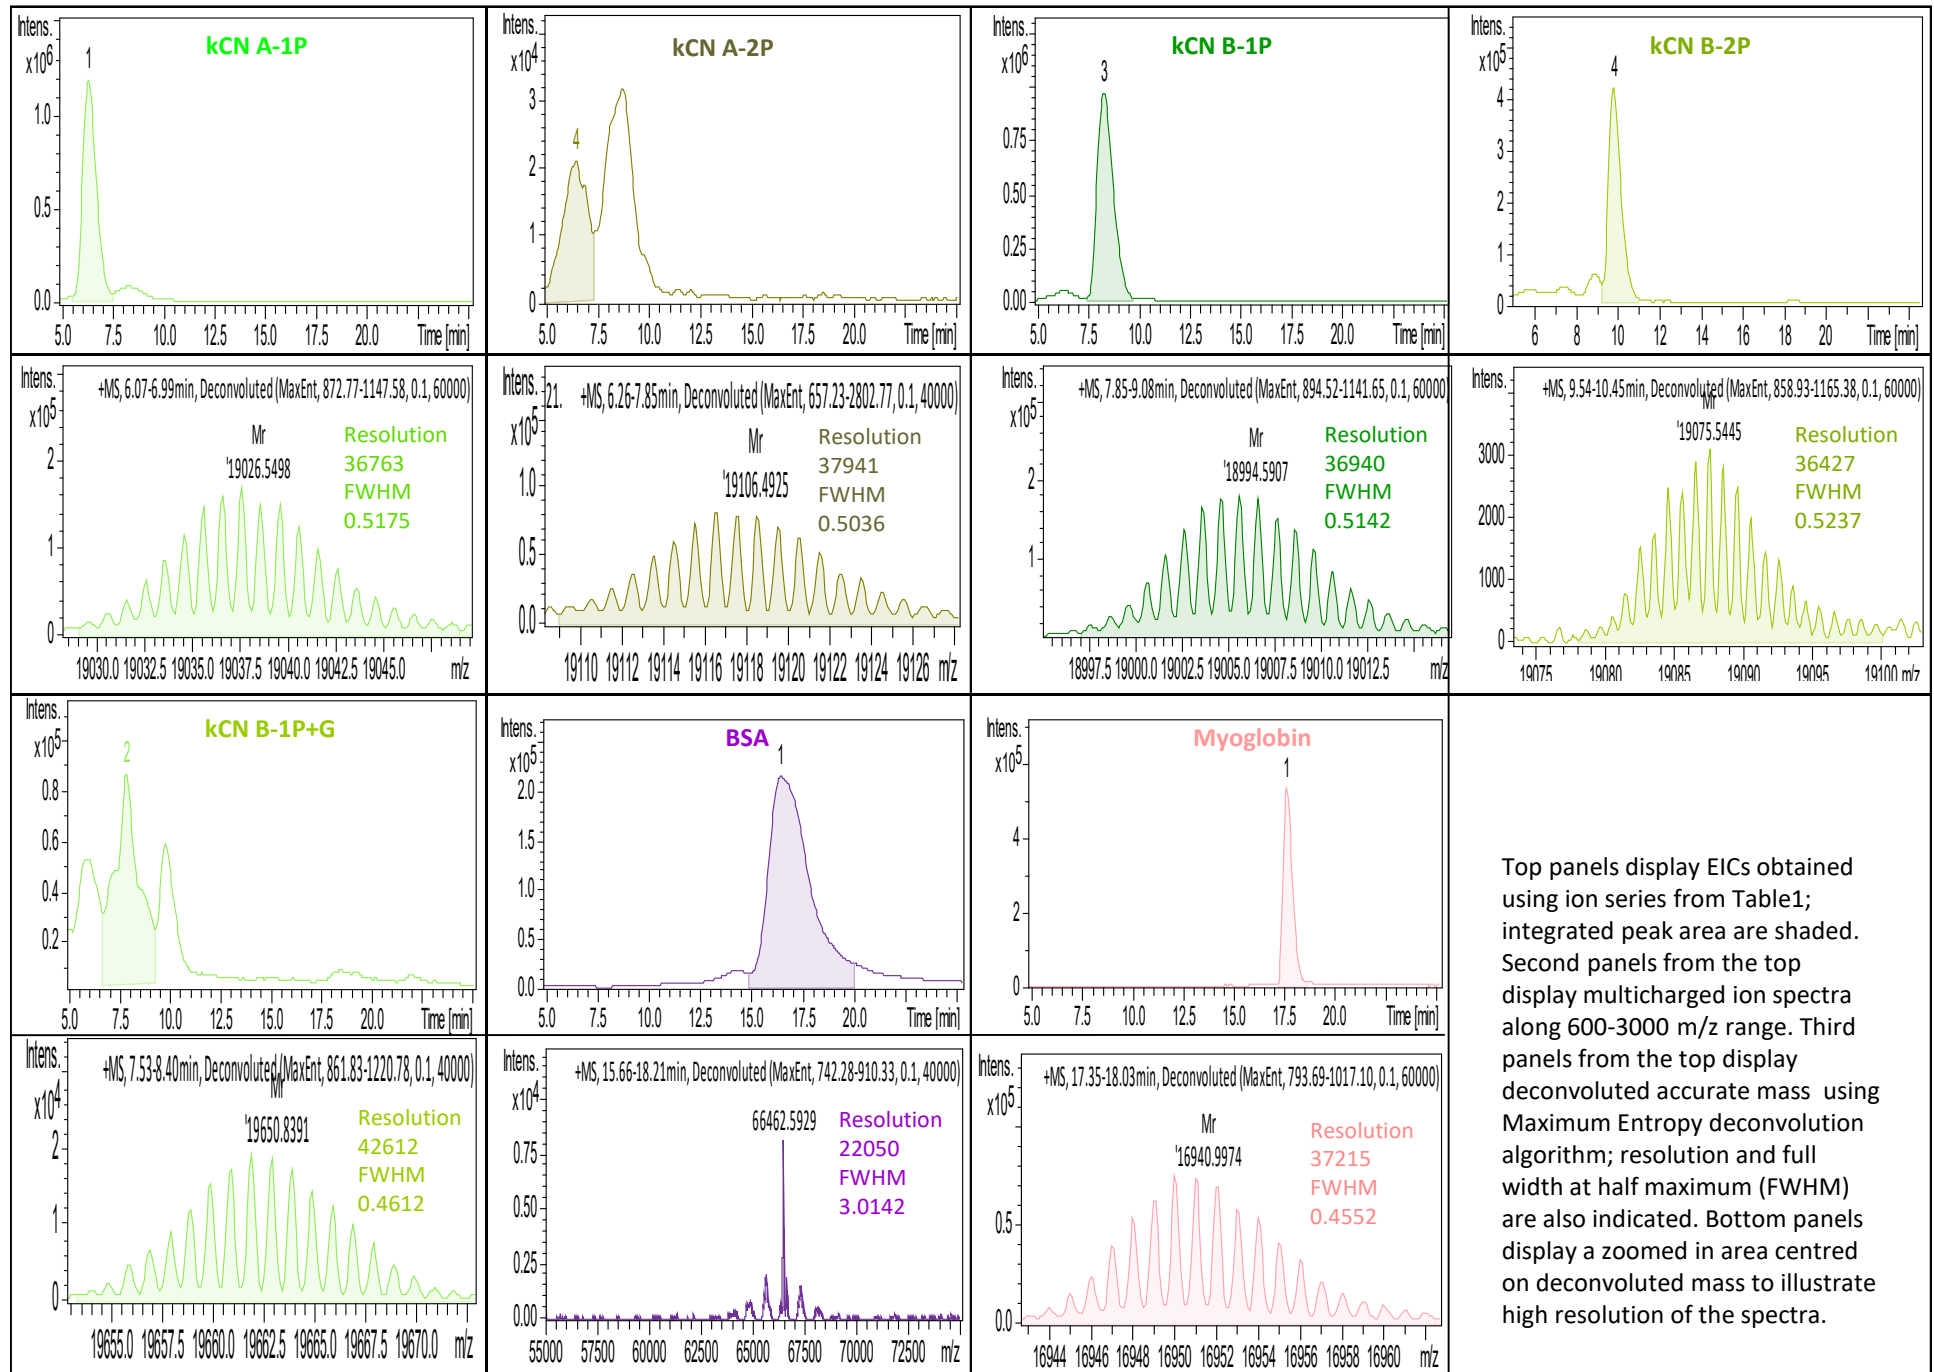

**Figure C.** Linearity of calibration of external standards.

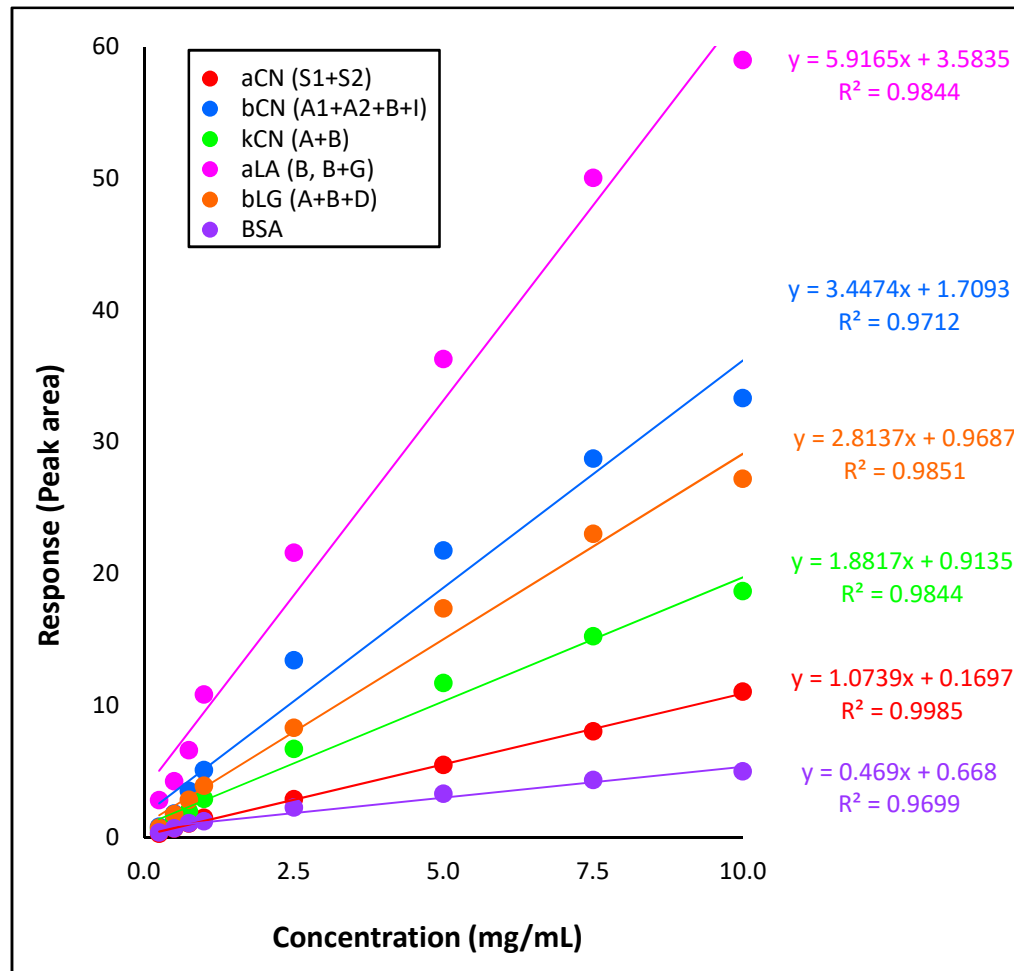

Two technical replicates were used to average the EIC peak areas. All external standards were solubilised in 50% Solution A. Trend lines and Pearson correlation coefficient (R<sup>2</sup>) values are displayed.

**Figure D.** Linearity of calibration of myoglobin internal standard and matrix effect.

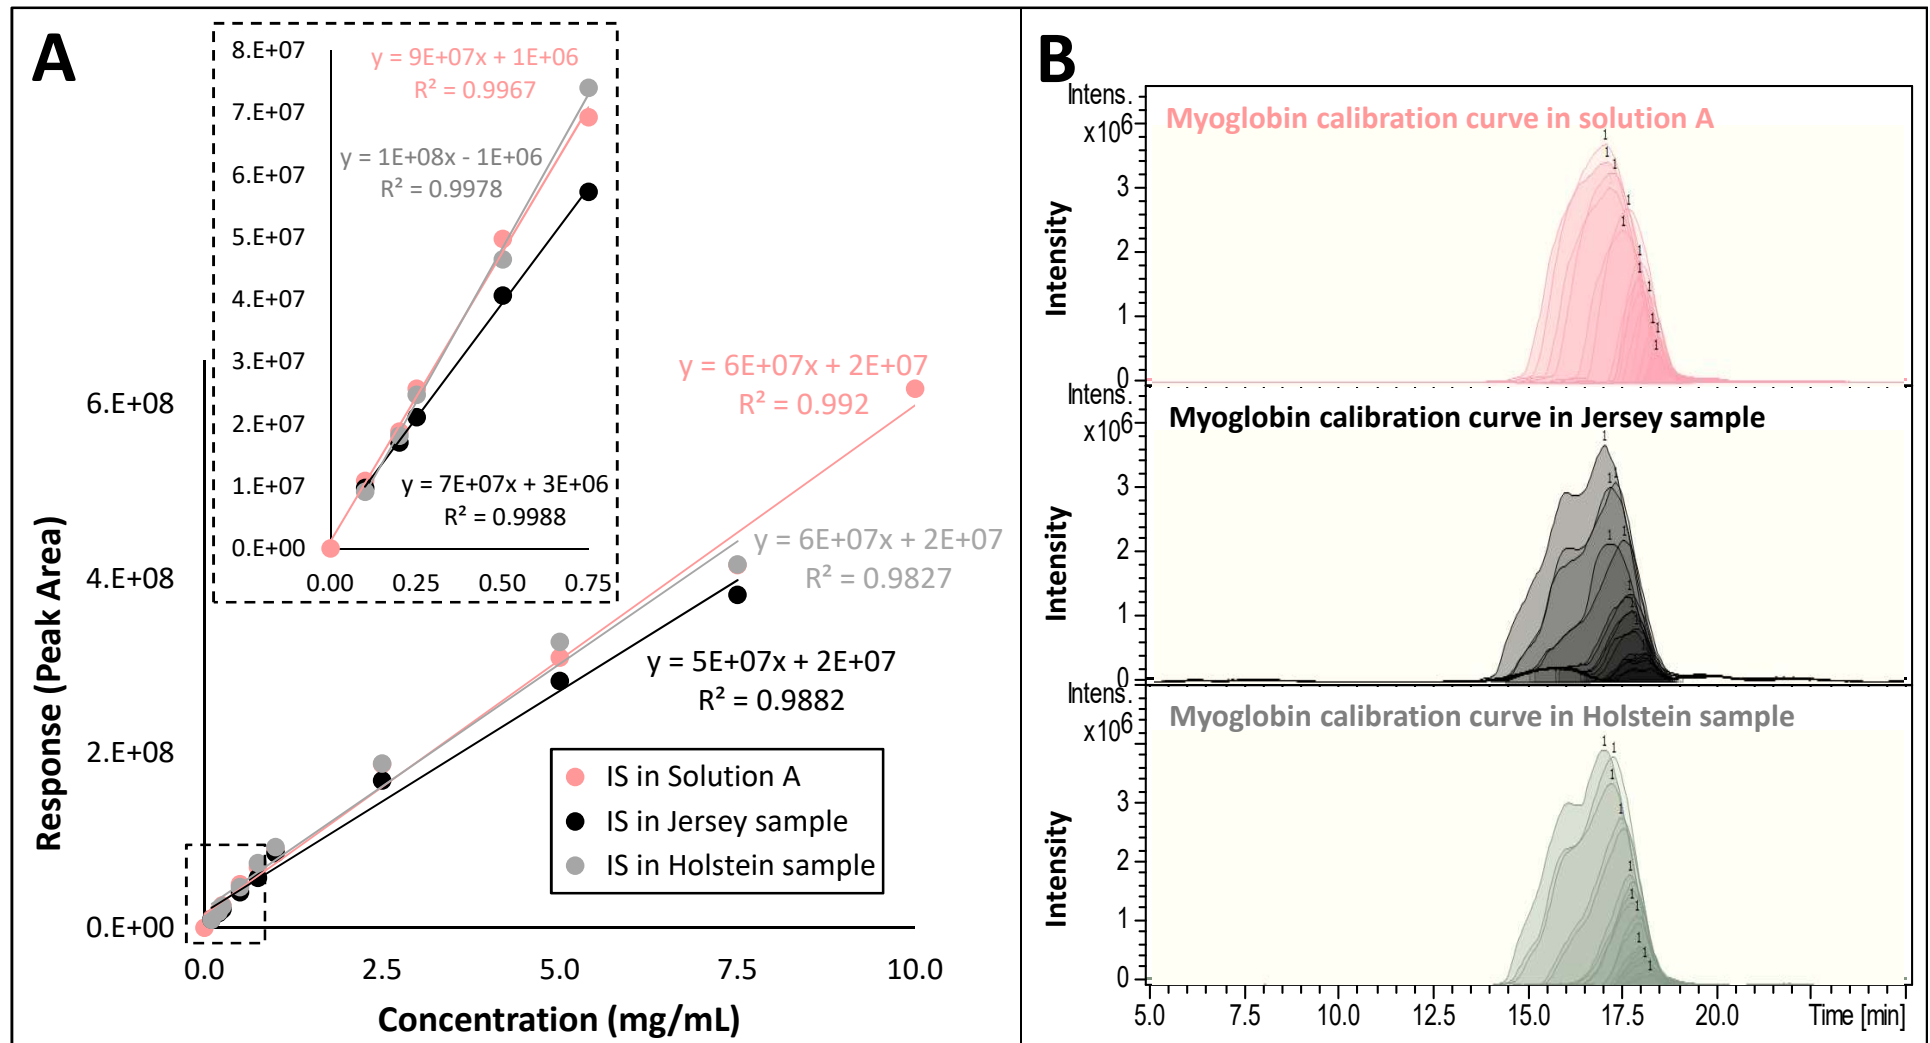

Two technical replicates were used to average the EIC peak areas. Three matrices were tested, 50% Solution A, Jersey milk sample, and Holstein milk sample. Panel A displays Myoglobin's response plotted against the whole concentration range (0-10 mg/mL). In the inset of panel A the concentration range has been limited to 0-1 mg/mL. Trend lines and Pearson correlation coefficients ( $R^2$ ) are displayed. Panel B displays the EICs of myoglobin prepared as increasing concentration (0.1-7.5mg/mL shown here) in each of the matrix along 5-25 min. The integrated peak areas are shaded.

**Figure E.** Reproducibility of protein external standard EICs across six replicates.

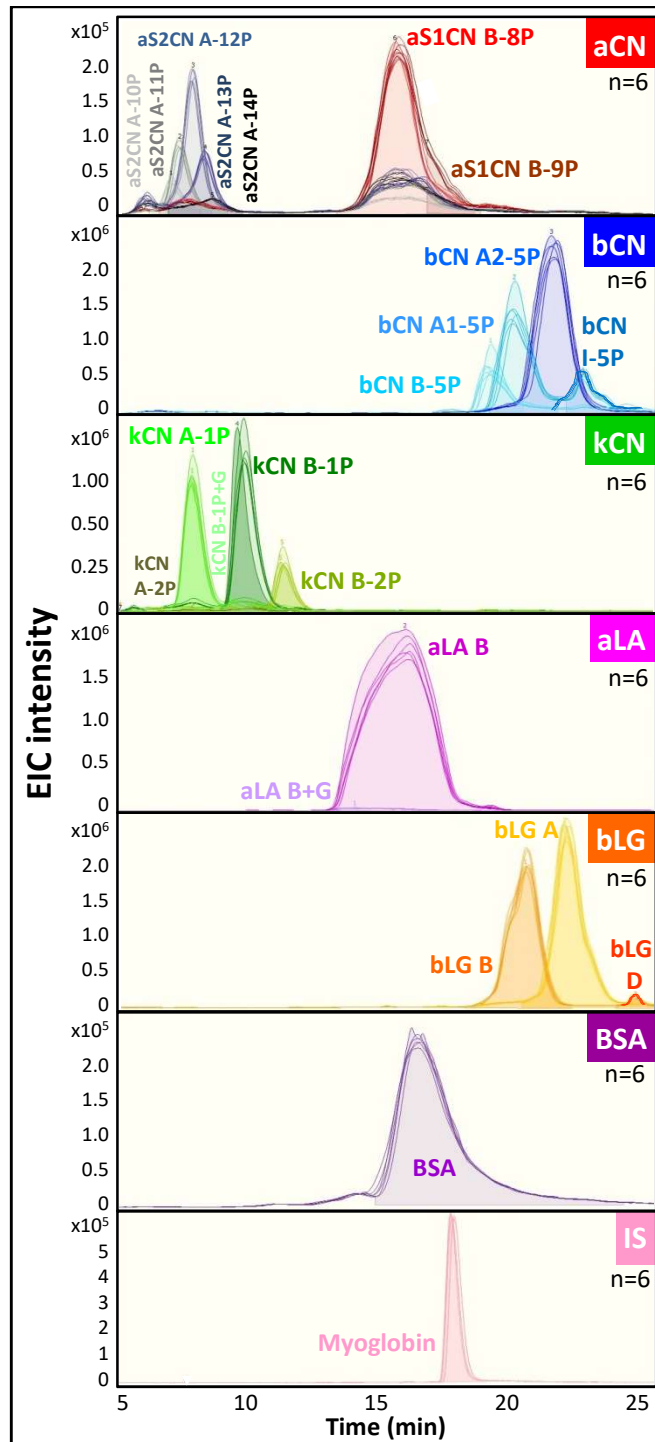

Three repeated injections on two different days, once spiked with myoglobin internal standard and once neat were used. The EIC of each protein of interest is color-coded and bear the abbreviated name of the variant. The shaded area corresponds to the peak area that was integrated as a proxy to protein quantity.

**Figure F.** Synopsis highlighting the benefit of using EICs over UV trace or BPC for protein quantitation.

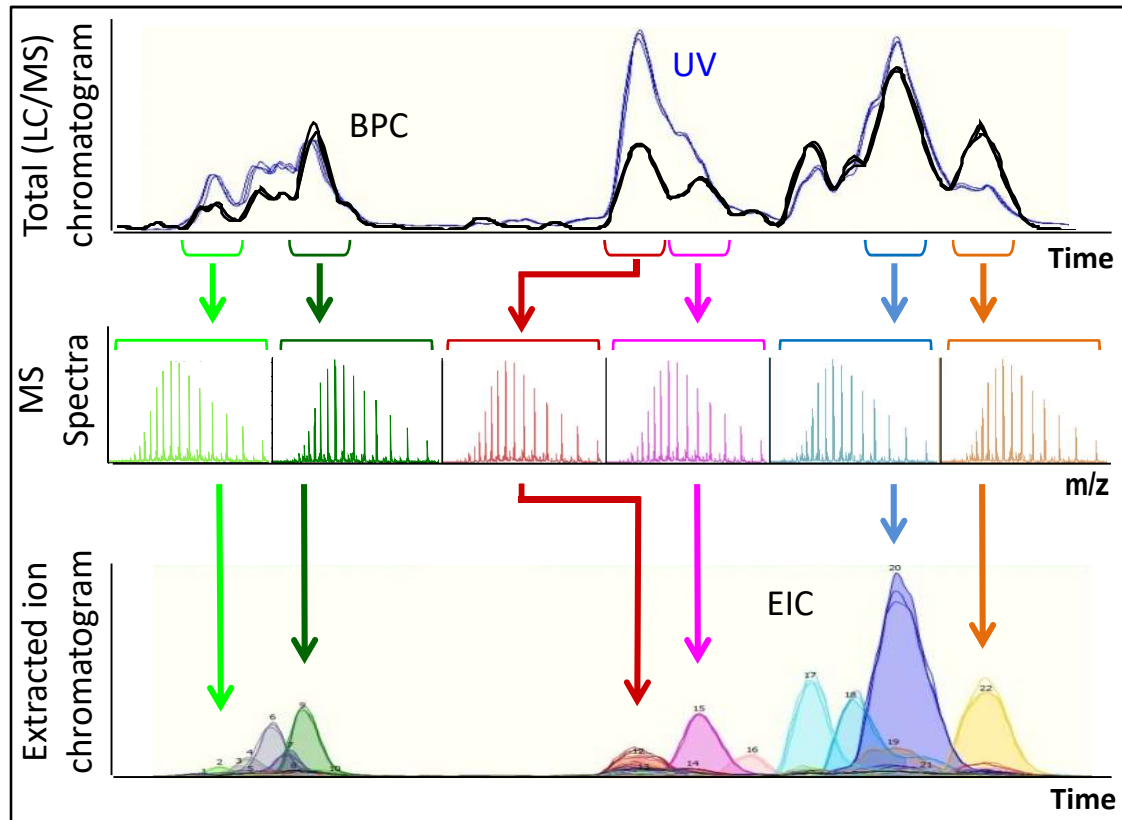

Proteins that partly co-elute following LC separation can only be accurately quantified by using given ions from their mass spectra to produce their EICs and integrating the EICs' area as a proxy to protein quantity. UV traces or BPCs both lack the resolution to distinguish between overlapping proteins.



**Table A. List of cow milk protein variants quantified in this study.**

| Protein name                                       | Protein code | RT apex (min) | Ion series (m/z) for Extracted Ion Chromatogram (EIC)                                                                                                                                                    |
|----------------------------------------------------|--------------|---------------|----------------------------------------------------------------------------------------------------------------------------------------------------------------------------------------------------------|
| alpha S1 casein variant B with 8 phosphorylations  | aS1CN B-8P   | 15.43         | 762.7257; 788.1166; 815.1211; 843.8743; 875.5735; 908.7102; 945.0179; 984.3516; 1027.1057; 1073.7012; 1124.8295; 1181.0196; 1243.1265; 1312.9660; 1389.2573; 1476.0230; 1574.3576; 1686.7394; 1816.4104  |
| alpha S1 casein variant B with 9 phosphorylations  | aS1CN B-9P   | 16.90         | 788.1168; 815.2588; 844.3741; 875.6098; 911.2101; 948.2142; 987.6421; 1030.5391; 1077.3829; 1128.5909; 1184.9695; 1247.2826; 1316.5764; 1393.9029; 1481.0211; 1579.6888; 1692.3803; 1822.5616            |
| alpha S2 casein variant A with 10 phosphorylations | aS2CN A-10P  | 6.60          | 786.4078; 812.2047; 839.3109; 868.1826; 899.1893; 932.3799; 968.2408; 1058.6513; 1094.4032; 1144.1019; 1197.8118; 1257.6524                                                                              |
| alpha S2 casein variant A with 11 phosphorylations | aS2CN A-11P  | 7.08          | 789.3213; 814.6872; 841.4438; 870.9386; 901.6017; 935.3413; 970.7007; 1009.5718; 1051.4684; 1097.1820; 1147.1024; 1201.6296; 1261.5587; 1327.9593; 1401.7330; 1484.0086                                  |
| alpha S2 casein variant A with 12 phosphorylations | aS2CN A-12P  | 7.30          | 767.7852; 791.8517; 817.3621; 844.5748; 873.6986; 904.8648; 938.3774; 974.3548; 1013.3269; 1055.5079; 1101.3122; 1151.3256; 1206.1511; 1266.3075                                                         |
| alpha S2 casein variant A with 13 phosphorylations | aS2CN A-13P  | 8.15          | 747.2341; 770.3701; 794.3830; 820.0057; 847.3089; 876.4538; 907.6877; 941.3673; 977.4302; 1016.4469; 1058.1650; 1104.1287; 1154.9609; 1209.9599; 1269.5981                                               |
| alpha S2 casein variant A with 14 phosphorylations | aS2CN A-14P  | 7.90          | 728.1969; 749.5850; 772.2694; 796.3716; 822.0287; 849.3963; 879.1786; 909.9961; 944.2659; 980.5045; 1019.3852; 1061.4954; 1108.2227; 1157.9041                                                           |
| alpha lactalbumin variant B                        | aLA B        | 15.80         | 710.3007; 747.5744; 789.0546; 835.4696; 887.5609; 946.7290; 1014.2109; 1092.1498; 1183.1611; 1290.5395; 1419.4929; 1577.2124; 1774.1134                                                                  |
| alpha lactalbumin variant B glycosylated           | aLA B+G      | 13.50         | 807.1165; 854.0036; 907.3157; 967.7360; 1036.7881; 1116.4636; 1209.4180; 1320.0940; 1451.0998; 1612.2210; 1813.6223                                                                                      |
| beta casein variant A1 with 5 phosphorylations     | bCN A1-5P    | 19.67         | 775.9205; 801.7817; 829.3260; 858.9438; 890.7163; 924.9396; 961.8943; 1001.9334; 1045.4511; 1092.9267; 1144.9217; 1202.1127; 1265.3377; 1335.5740; 1502.4192; 1602.4707; 1716.8965; 1848.8826            |
| beta casein variant A2 with 5 phosphorylations     | bCN A2-5P    | 21.15         | 774.6299; 800.4153; 827.9816; 857.5153; 889.2381; 923.4010; 960.3287; 1000.2660; 1043.7116; 1091.1064; 1143.0184; 1200.1177; 1263.2334; 1333.3538; 1411.7368; 1499.9261; 1599.8547; 1714.0327; 1845.8191 |
| beta casein variant B with 5 phosphorylations      | bCN B-5P     | 18.76         | 804.0184; 831.7437; 861.4137; 893.2421; 927.6297; 964.6547; 1004.8101; 1048.4951; 1096.0719; 1148.1649; 1205.5725; 1269.0227; 1339.4159; 1418.1583; 1506.7784; 1607.1052; 1721.7413; 1854.2840           |
| beta casein variant I with 5 phosphorylations      | bCN I-5P     | 22.20         | 960.2969; 1000.2673; 1043.7132; 1091.1090; 1143.0658; 1200.1688; 1263.2300; 1333.4087; 1410.7296; 1498.7738; 1598.7585; 1712.8122                                                                        |
| beta lactoglobulin variant A                       | BLG A        | 22.10         | 707.4514; 735.6717; 766.2697; 799.5516; 835.8495; 875.6037; 919.3457; 967.6503; 1021.3772; 1081.3731; 1148.9139; 1225.4408; 1312.9003; 1413.8150; 1531.5496; 1670.6903; 1837.6585; 2041.7292             |
| beta lactoglobulin variant B                       | BLG B        | 20.65         | 704.0654; 732.1901; 762.6859; 795.7976; 831.9386; 871.5034; 915.0445; 963.1508; 1016.5708; 1076.3453; 1143.5365; 1219.7068; 1306.8210; 1407.1980; 1524.3810; 1662.8676; 1829.0536                        |
| beta lactoglobulin variant D                       | BLG D        | 24.70         | 704.1039; 732.2277; 762.6948; 795.8112; 831.3915; 871.5068; 915.0315; 963.1379; 1016.5893; 1076.3292; 1143.5365; 1219.7071; 1306.7549; 1407.1969; 1524.3792; 1662.8677                                   |
| bovine serum albumin                               | BSA          | 16.51         | 747.7548; 756.2491; 764.9476; 773.8395; 782.9061; 792.2301; 801.7902; 811.5230; 821.5470; 831.8010; 842.3110; 853.1087; 864.1506; 875.5008; 899.1319; 911.4582; 924.1183; 937.1112; 950.4742             |
| kappa casein variant A with 1 phosphorylation      | kCN A-1P     | 6.44          | 794.2455; 828.6933; 866.3333; 907.5350; 952.8754; 1002.9616; 1058.6340; 1120.8439; 1190.8381; 1270.1627; 1360.7713; 1465.4370; 1587.4715; 1731.6931; 1904.8598                                           |
| kappa casein variant A with 2 phosphorylations     | kCN A-2P     | 6.83          | 865.7596; 910.8413; 952.3842; 1002.4571; 1062.4800; 1124.9194; 1195.1631; 1274.7737; 1365.7572; 1593.2160                                                                                                |
| kappa casein variant B with 1 phosphorylation      | kCN B-1P     | 8.28          | 827.3404; 864.9012; 906.0195; 951.2667; 1001.3047; 1056.8574; 1118.9571; 1188.8232; 1268.0501; 1358.5464; 1462.9797; 1584.8062; 1728.7048; 1901.5674                                                     |
| kappa casein variant B with 2 phosphorylations     | kCN B-2P     | 9.82          | 804.6199; 846.9331; 893.9743; 946.4931; 1005.5246; 1072.5561; 1149.0928; 1237.4840; 1340.5254; 1608.1322; 1787.0290                                                                                      |
| kappa casein variant B-1P glycosylated             | kCN B-1P+G   | 7.90          | 787.0335; 819.7849; 855.3843; 894.2199; 937.2875; 984.1520; 1035.8427; 1093.3890                                                                                                                         |
| myoglobin (internal standard)                      | Myo (IS)     | 17.54         | 707.3013; 737.9600; 771.5100; 808.1500; 848.5600; 893.1700; 942.7300; 998.1300; 1060.4500; 1131.0100; 1211.7900; 1304.9300; 1413.5930; 1542.0098                                                         |

Indicated are proteins full name, their abbreviated code, the retention time (RT) at their apex as a 10 mg/mL solution standard, and the ion series used to produce their Extracted Ion Chromatogram (EICs) using a +/- 0.1 m/z tolerance.

**Table B. Relevant publically available information on the cow milk protein variants quantified in this study. The table is split into two parts.**

| Protein code | UniProt number | Number of AA residues (mature form) | Maturation processing (SP, PP, other) [a] | Sequence variation (position in mature form)                                                 | PTMs (position in mature form) [b]                                 | GRAVY [c] | Theoretical monoisotopic mass (Daltons) |
|--------------|----------------|-------------------------------------|-------------------------------------------|----------------------------------------------------------------------------------------------|--------------------------------------------------------------------|-----------|-----------------------------------------|
| aS1CN B-8P   | P02662         | 214 (199)                           | SP 1-15                                   | A(53), Q(59), E(192)                                                                         | 8xS* (46, 48, 64, 66, 67, 68, 75, 115) [+640D]                     | -0.704    | 23600.472                               |
| aS1CN B-9P   | P02662         | 214 (199)                           | SP 1-15                                   | sqce from aS1CN B-8P                                                                         | 9xS* (41, 46, 48, 64, 66, 67, 68, 75, 115) [+720D]                 | -0.704    | 23680.472                               |
| aS2CN A-10P  | P02663         | 222 (207)                           | SP 1-15                                   | E(33), A(47), T(130)                                                                         | 10xS* (8, 9, 10, 13, 31, 56, 57, 58, 61, 143) [+800D]              | -0.918    | 25133.343                               |
| aS2CN A-11P  | P02663         | 222 (207)                           | SP 1-15                                   | E(33), A(47), T(130)                                                                         | 11xS* (8, 9, 10, 13, 31, 56, 57, 58, 61, 143, ?) [+880D]           | -0.918    | 25213.343                               |
| aS2CN A-12P  | P02663         | 222 (207)                           | SP 1-15                                   | E(33), A(47), T(130)                                                                         | 12xS* (8, 9, 10, 13, 31, 56, 57, 58, 61, 143, ?, ?) [+960D]        | -0.918    | 25293.343                               |
| aS2CN A-13P  | P02663         | 222 (207)                           | SP 1-15                                   | E(33), A(47), T(130)                                                                         | 13xS* (8, 9, 10, 13, 31, 56, 57, 58, 61, 143, ?, ?, ?) [+1040D]    | -0.918    | 25373.343                               |
| aS2CN A-14P  | P02663         | 222 (207)                           | SP 1-15                                   | E(33), A(47), T(130)                                                                         | 14xS* (8, 9, 10, 13, 31, 56, 57, 58, 61, 143, ?, ?, ?, ?) [+1120D] | -0.918    | 25453.343                               |
| aLA B        | P00711         | 142 (123)                           | SP 1-19                                   | R(10), D(?)                                                                                  |                                                                    | -0.453    | 14176.798                               |
| aLA B+G      | P00711         | 142 (123)                           | SP 1-19                                   | R(10), D(?)                                                                                  | 2*Gal/Man (45) [+324D]                                             | -0.453    | 14500.902                               |
| bCN A1-5P    | P02666         | 224 (209)                           | SP 1-15                                   | sqce from bCNA2-5P: P → H(67)                                                                | 5xS* (15, 17, 18, 19, 35) [+400D]                                  | -0.362    | 24008.317                               |
| bCN A2-5P    | P02666         | 224 (209)                           | SP 1-15                                   | R(25), E(36), E(37), P(67), Q(72), L(88), M(93), H(106), S(122), L/P (137/138), P(152), Q(?) | 5xS* (15, 17, 18, 19, 35) [+400D]                                  | -0.355    | 23968.311                               |
| bCN B-5P     | P02666         | 224 (209)                           | SP 1-15                                   | sqce from bCNA2-5P: P → H(67), S → R(122)                                                    | 5xS* (15, 17, 18, 19, 35) [+400D]                                  | -0.380    | 24077.386                               |
| bCN I-5P     | P02666         | 224 (209)                           | SP 1-15                                   | sqce from bCNA2-5P: M → L(93)                                                                | 5xS* (15, 17, 18, 19, 35) [+400D]                                  | -0.345    | 23950.355                               |
| bLG A        | P02754         | 178 (162)                           | SP 1-16                                   | sqce from bLGB: G → D(64), A → V(118)                                                        |                                                                    | -0.167    | 18355.446                               |
| bLG B        | P02754         | 178 (162)                           | SP 1-16                                   | E(45), P(50), I(56), Q(59), G(64), K(70), I(78), E(108), A(118), P(126), D(129), E(158)      |                                                                    | -0.162    | 18269.409                               |
| bLG D        | P02754         | 178 (162)                           | SP 1-16                                   | sqce from bLGB: E → Q(45)                                                                    |                                                                    | -0.162    | 18268.410                               |
| BSA          | P02769         | 607 (583)                           | SP 1-18, PP 19-24                         | A → T (224)                                                                                  |                                                                    | -0.479    | 66462.966                               |
| kCN A-1P     | P02668         | 190 (169)                           | SP 1-21                                   | Q → PyrE(1), R(10), R(97), S(104), T(135), T(136), D(148), S(155)                            | 1xS* (149) [+80D] + E*(1)[-17.026D]                                | -0.557    | 19026.542                               |
| kCN A-2P     | P02668         | 190 (169)                           | SP 1-21                                   | Q → PyrE(1), R(10), R(97), S(104), T(135), T(136), D(148), S(155)                            | 2xS* (127, 149) [+160D] + E*(1)[-17.026D]                          | -0.557    | 19106.542                               |
| kCN B-1P     | P02668         | 190 (169)                           | SP 1-21                                   | sqce from kCNA-1P: Q → PyrE(1), T → I(136), D → A(148)                                       | 1xS* (149) [+80D] + 1xE*(1) [-17.026D]                             | -0.495    | 18994.589                               |
| kCN B-2P     | P02668         | 190 (169)                           | SP 1-21                                   | sqce from kCNB-1P                                                                            | 2xS* (127, 149) [+160D] + 1xE*(1) [-17.026D]                       | -0.495    | 19074.589                               |
| kCN B-1P+G   | P02668         | 190 (169)                           | SP 1-21                                   | sqce from kCNB-1P                                                                            | 1*GalNAc-Gal(NeuAc) (?) [+656D]                                    | -0.495    | 19650.817                               |
| Myo (IS)     | P68082         | 154 (153)                           | initial M(1) removed                      |                                                                                              |                                                                    | -0.396    | 16940.956                               |

Indicated are their Uniprot accession number, the number of amino acid residues in both the preprocessed and the mature forms, the processed domains, the sequence allelic variations and their position in the sequence of the mature form, the number of post-translational modifications and their position in the sequence of the mature form, the manually curated amino acid sequence, the grand average of hydropathicity (GRAVY) index, and the theoretical mass. [a] processing as part of protein maturation events include removal of the Signal Peptide (SP), and the Propeptide (PP), or the removal of the initial Methionine (M) residue; [b] post-translational modifications (PTMS) are coded as follows: phosphoserine residues (S\*), N-terminus pyroglutamate (E\*). Their position in the mature form of the protein are indicated in round brackets () and the mass shifts resulting from it are indicated in square brackets []. Question marks (?) indicates that the position of the PTM is not known; [c] the grand average of hydropathicity (GRAVY) index was computed online ([web.expasy.org/protparam/](http://web.expasy.org/protparam/)) using the AA sequence manually curated of the mature protein.

**Table B. Second part: amino acid sequences.**

| Protein code | AA sequence retrieved from UniProt and modified based on Farrell et al 2004 [c]                                                                                                                                                                                                                                                                                                                                                                                                                                                                                                                                            |
|--------------|----------------------------------------------------------------------------------------------------------------------------------------------------------------------------------------------------------------------------------------------------------------------------------------------------------------------------------------------------------------------------------------------------------------------------------------------------------------------------------------------------------------------------------------------------------------------------------------------------------------------------|
| aS1CN B-8P   | (MKLLILTLCLVAVALA)RPKHPIKHQGLPQEVLENENLRRFFVAPFPEVFGKEKVNELSKDIGS*ES*TEDQAMEDIKQMEAES*IS*S*S*EEIVPNS*VEQKHIQKEDVPSERYLGYLEQLLRLKKYKVPQLEIVPNS*AEERLHSMKEGIHAQQKEPMIGVNQELAYFYPELFRQFYQLDAYPSGAWYVPLGTQYTDAPSFSDIPNPIGSENSEKTTMPLW                                                                                                                                                                                                                                                                                                                                                                                          |
| aS1CN B-9P   | (MKLLILTLCLVAVALA)RPKHPIKHQGLPQEVLENENLRRFFVAPFPEVFGKEKVNELSKDIGS*ES*TEDQAMEDIKQMEAES*IS*S*S*EEIVPNS*VEQKHIQKEDVPSERYLGYLEQLLRLKKYKVPQLEIVPNS*AEERLHSMKEGIHAQQKEPMIGVNQELAYFYPELFRQFYQLDAYPSGAWYVPLGTQYTDAPSFSDIPNPIGSENSEKTTMPLW                                                                                                                                                                                                                                                                                                                                                                                          |
| aS2CN A-10P  | (MKFFIFTCLLAVALA)KNTMEHVS*S*S*EESIIS*QETYKQEKNNMAINPS*KENLCSTFCKEVVRNANEEEYSIGS*S*S*EES*AEVATEEVKITVDDKHYQKALNEINQFYQKFPQYLQYLYQGPIVLPWDQVKRNAVPIPTLNREQLSTSEENSKKTVDMES*TEVFTKTKLTEEEKNRLNFKKISQRYQKQFALPQYLKTVYQHQAAMKPWIQPKTKVIPYVRYL                                                                                                                                                                                                                                                                                                                                                                                   |
| aS2CN A-11P  | (MKFFIFTCLLAVALA)KNTMEHVS*S*S*EESIIS*QETYKQEKNNMAINPS*KENLCSTFCKEVVRNANEEEYSIGS*S*S*EES*AEVATEEVKITVDDKHYQKALNEINQFYQKFPQYLQYLYQGPIVLPWDQVKRNAVPIPTLNREQLSTSEENSKKTVDMES*TEVFTKTKLTEEEKNRLNFKKIS*QRYQKQFALPQYLKTVYQHQAAMKPWIQPKTKVIPYVRYL                                                                                                                                                                                                                                                                                                                                                                                  |
| aS2CN A-12P  | (MKFFIFTCLLAVALA)KNTMEHVS*S*S*EESIIS*QETYKQEKNNMAINPS*KENLCSTFCKEVVRNANEEEYSIGS*S*S*EES*AEVATEEVKITVDDKHYQKALNEINQFYQKFPQYLQYLYQGPIVLPWDQVKRNAVPIPTLNREQLSTSEENS*KKTVDMES*TEVFTKTKLTEEEKNRLNFKKIS*QRYQKQFALPQYLKTVYQHQAAMKPWIQPKTKVIPYVRYL                                                                                                                                                                                                                                                                                                                                                                                 |
| aS2CN A-13P  | (MKFFIFTCLLAVALA)KNTMEHVS*S*S*EESIIS*QETYKQEKNNMAINPS*KENLCSTFCKEVVRNANEEEYSIGS*S*S*EES*AEVATEEVKITVDDKHYQKALNEINQFYQKFPQYLQYLYQGPIVLPWDQVKRNAVPIPTLNREQLSTSEENS*KKTVDMES*TEVFTKTKLTEEEKNRLNFKKIS*QRYQKQFALPQYLKTVYQHQAAMKPWIQPKTKVIPYVRYL                                                                                                                                                                                                                                                                                                                                                                                 |
| aS2CN A-14P  | (MKFFIFTCLLAVALA)KNTMEHVS*S*S*EESIIS*QETYKQEKNNMAINPS*KENLCSTFCKEVVRNANEEEYSIGS*S*S*EES*AEVATEEVKITVDDKHYQKALNEINQFYQKFPQYLQYLYQGPIVLPWDQVKRNAVPIPTLNREQLS*TESENS*KKTVDMES*TEVFTKTKLTEEEKNRLNFKKIS*QRYQKQFALPQYLKTVYQHQAAMKPWIQPKTKVIPYVRYL                                                                                                                                                                                                                                                                                                                                                                                |
| aLA B        | (MMSFVSLLLVIGILFHATQA)EQLTKCEVFRKLDLKGYGVSLEPWCCTFFHTSGYDTQAIVQNNDSLEYGLFQINNKIWKDDQNPSSNICNSCDKFLDDDLTDDIMCVKILDKVGINYWLHAHKALCSEKLDQWLCEKL                                                                                                                                                                                                                                                                                                                                                                                                                                                                               |
| aLA B+G      | (MMSFVSLLLVIGILFHATQA)EQLTKCEVFRKLDLKGYGVSLEPWCCTFFHTSGYDTQAIVQNNDSLEYGLFQINNKIWKDDQNPSSNICNSCDKFLDDDLTDDIMCVKILDKVGINYWLHAHKALCSEKLDQWLCEKL                                                                                                                                                                                                                                                                                                                                                                                                                                                                               |
| bCN A1-5P    | (MKVLILACLVALALA)RELEELNVPGEIVES*LS*S*S*EESITRINKKIEKFS*EEQQQTEDELQDKIHFFAQTQSLVYVFPFGPIHNSLPQNIPLTQTTPVVVPPFLQPEVMGVSKVKEAMAPKHKEMPFKYPVEPFTEQSLLTLDVENLHPLPLLQSWMHQHPQLPPTVMFPPQSVLSQSKVLPVPQKAVPYQQRDMPIQAFLLYQEPVLPVGRGPFPIIV                                                                                                                                                                                                                                                                                                                                                                                          |
| bCN A2-5P    | (MKVLILACLVALALA)RELEELNVPGEIVES*LS*S*S*EESITRINKKIEKFS*EEQQQTEDELQDKIHFFAQTQSLVYVFPFGPIHNSLPQNIPLTQTTPVVVPPFLQPEVMGVSKVKEAMAPKHKEMPFKYPVEPFTEQSLLTLDVENLHPLPLLQSWMHQHPQLPPTVMFPPQSVLSQSKVLPVPQKAVPYQQRDMPIQAFLLYQEPVLPVGRGPFPIIV                                                                                                                                                                                                                                                                                                                                                                                          |
| bCN B-5P     | (MKVLILACLVALALA)RELEELNVPGEIVES*LS*S*S*EESITRINKKIEKFS*EEQQQTEDELQDKIHFFAQTQSLVYVFPFGPIHNSLPQNIPLTQTTPVVVPPFLQPEVMGVSKVKEAMAPKHKEMPFKYPVEPFTEQSLLTLDVENLHPLPLLQSWMHQHPQLPPTVMFPPQSVLSQSKVLPVPQKAVPYQQRDMPIQAFLLYQEPVLPVGRGPFPIIV                                                                                                                                                                                                                                                                                                                                                                                          |
| bCN I-5P     | (MKVLILACLVALALA)RELEELNVPGEIVES*LS*S*S*EESITRINKKIEKFS*EEQQQTEDELQDKIHFFAQTQSLVYVFPFGPIHNSLPQNIPLTQTTPVVVPPFLQPEVLGVSKVKEAMAPKHKEMPFKYPVEPFTEQSLLTLDVENLHPLPLLQSWMHQHPQLPPTVMFPPQSVLSQSKVLPVPQKAVPYQQRDMPIQAFLLYQEPVLPVGRGPFPIIV                                                                                                                                                                                                                                                                                                                                                                                          |
| bLG A        | (MKCLLLALALTCGAQA)LIVTQTMKGLDIQKVAGTWYSLAMAASDISLLDAQSAPLRVYVEELKPTPEGDLEILLQKWEN <u>DE</u> CAQKIIAEKTKIPAVFKIDALNENKVLVLDTDYKYLFCMENSEAEQSLV <u>Q</u> CQCLVRTPEVDDEALEKFDKALKALPMHIRLSFNPTQLEEQCHI                                                                                                                                                                                                                                                                                                                                                                                                                        |
| bLG B        | (MKCLLLALALTCGAQA)LIVTQTMKGLDIQKVAGTWYSLAMAASDISLLDAQSAPLRVYVEELKPTPEGDLEILLQKWEN <u>DE</u> CAQKIIAEKTKIPAVFKIDALNENKVLVLDTDYKYLFCMENSEAEQSLACQCLVRTPEVDDEALEKFDKALKALPMHIRLSFNPTQLEEQCHI                                                                                                                                                                                                                                                                                                                                                                                                                                  |
| bLG D        | (MKCLLLALALTCGAQA)LIVTQTMKGLDIQKVAGTWYSLAMAASDISLLDAQSAPLRVYVEEL <u>QL</u> KPTPEGDLEILLQKWEN <u>DE</u> CAQKIIAEKTKIPAVFKIDALNENKVLVLDTDYKYLFCMENSEAEQSLACQCLVRTPEVDDEALEKFDKALKALPMHIRLSFNPTQLEEQCHI                                                                                                                                                                                                                                                                                                                                                                                                                       |
| BSA          | (MKWVTFISLLLFSSAYS)(RGVFRR)DTHKSEIAHRFKDLGEEHFGLVLIASFQYLQCPFDEHVKLVNELTEFAKTCVADESHAGCEKSLHTLFGDELCKVASLRETYGDMADCCEKQEPERNECFLSHKDDSPDLPLKLPDPNTLCEFKADEKKFWGKYLYEIAARRHPYFAPPELLYANKYNGVFQEQCAEDKGAELLPKIETMREKVLASSARQLRCT <u>SI</u> QKFGERALKAWSVARLSQKFPKAEFVEVTKLVDLTKVHKECCHGDLLCADDRADLAKYICDNQDTISSKLECCDKPLLEKSHCIAEVEKDAIPENLPLTADFAEDKDVKCKNYQEAQDAFLGSFLYEYSRRHPYAVSVLLRLAKEYEATLECCAKDDPHACYSTVDFDKLHLVDEPQNLIKQNCDFEKLGEYGFQNALIVRYTRKVPQVSTPTLVEVSRSLGKVGTRCCTKPESEMPCTEDYLSLILNRLCVLHEKTPVSEKVKCTCESLVNRRPFCFSALTPDETYVPKAFDEKLFTHADICTLPDTEKIQKQATLVELLKHKPKATEEQLKTMENFVAFVDKCAADDKEACFAVEGPKLVSTQTALA |
| kCN A-1P     | (MMKSFFLVVTILALTLPFLGA) <u>E</u> EQNQEQPIRCEKDERFFSDKIAKYIPIQYVLSRYSYGLNYYQKQKVALINNQFLPYPPYAKAAVRSQAQILQWQVLSNTVPAKSCQAQPTTMARHPPHLSFMAIPPKNQDKTEIPTINTIASGEPTSTPTT EAVESTVATLEDS*PEVIESPPEINTVQVTSTAV                                                                                                                                                                                                                                                                                                                                                                                                                    |
| kCN A-2P     | (MMKSFFLVVTILALTLPFLGA) <u>E</u> EQNQEQPIRCEKDERFFSDKIAKYIPIQYVLSRYSYGLNYYQKQKVALINNQFLPYPPYAKAAVRSQAQILQWQVLSNTVPAKSCQAQPTTMARHPPHLSFMAIPPKNQDKTEIPTINTIASGEPTSTPTT EAVESTVATLEDS*PEVIESPPEINTVQVTSTAV                                                                                                                                                                                                                                                                                                                                                                                                                    |
| kCN B-1P     | (MMKSFFLVVTILALTLPFLGA) <u>E</u> EQNQEQPIRCEKDERFFSDKIAKYIPIQYVLSRYSYGLNYYQKQKVALINNQFLPYPPYAKAAVRSQAQILQWQVLSNTVPAKSCQAQPTTMARHPPHLSFMAIPPKNQDKTEIPTINTIAS*GEPTSTPTT <u>IE</u> AVESTVATLE <u>AS</u> *PEVIESPPEINTVQVTSTAV                                                                                                                                                                                                                                                                                                                                                                                                 |
| kCN B-2P     | (MMKSFFLVVTILALTLPFLGA) <u>E</u> EQNQEQPIRCEKDERFFSDKIAKYIPIQYVLSRYSYGLNYYQKQKVALINNQFLPYPPYAKAAVRSQAQILQWQVLSNTVPAKSCQAQPTTMARHPPHLSFMAIPPKNQDKTEIPTINTIAS*GEPTSTPTT <u>IE</u> AVESTVATLE <u>AS</u> *PEVIESPPEINTVQVTSTAV                                                                                                                                                                                                                                                                                                                                                                                                 |
| kCN B-1P+G   | (MMKSFFLVVTILALTLPFLGA) <u>E</u> EQNQEQPIRCEKDERFFSDKIAKYIPIQYVLSRYSYGLNYYQKQKVALINNQFLPYPPYAKAAVRSQAQILQWQVLSNTVPAKSCQAQPTTMARHPPHLSFMAIPPKNQDKTEIPTINTIASGEPTSTPTT <u>IE</u> AVESTVATLE <u>AS</u> *PEVIESPPEINTVQVTSTAV                                                                                                                                                                                                                                                                                                                                                                                                  |
| Myo (IS)     | (M)GLSDGEWQQVLNVWGKVEADIAGHQEVLRFLRGTGHPETLEKFDKFKHLKTEAEMKASEDLKKHGTVLTALGGILKKGKHHEALKPLAQSHATKHKIPIKYLEFISDAIIVHLSKHPGDFGADAGAMTKALEFRNDIAAKYKELFGQG                                                                                                                                                                                                                                                                                                                                                                                                                                                                    |

[d] AA sequence retrieved from UniProt website (<http://www.uniprot.org/>) and further manually modified as per Farrell et al 2004, Holland et al 2004, and Bijl et al., 2014, to match variant sequence. AA residues removed as part of the processing are indicated in brackets (Signal peptide SP, propeptides PP, initial Methionine M(1)) (they are not considered to compute the theoretical monoisotopic mass). Phosphoresidues are indicated with an asterisk. AA substitutions are underlined. Glycosylation sites are in grey.

**Table C. Comparison of published method parameters for the analysis of major bovine milk proteins and our optimum method.**

| first author     | year | milk type  | protein extraction buffer                               | column supplier      | stationary phase   | column porosity | diameter (mm) | radius (mm) | length (mm) | particle size (um) (dp) | pore diameter (nm) (p) | injection volume (uL) | flow rate (mL/min) (F) | temperature (°C) | phase B composition        | gradient ramp (%B) | gradient time (min) | MS type   | Vm   | N    |
|------------------|------|------------|---------------------------------------------------------|----------------------|--------------------|-----------------|---------------|-------------|-------------|-------------------------|------------------------|-----------------------|------------------------|------------------|----------------------------|--------------------|---------------------|-----------|------|------|
| Bijl             | 2014 | skim milk  | n.i.                                                    | BioRad               | DEAE-5PW           | n.i.            | n.i.          | n.i.        | n.i.        | n.i.                    | n.i.                   | 25                    | 0.4                    | 40               | n.i.                       | n.i.               | 33                  | none      |      |      |
| Bobe             | 1998 | full cream | 0.1M BisTris /6M GdnHCl /5.37mM Na citrate /19.5 mM DTT | Rainin Instruments   | Microsorb MV C18   | fully porous    | 4.6           | 2.30        | 250         | 5.0                     | 30                     | 20                    | 1.20                   | RT               | 90%ACN /9.9%H2O /0.1%TFA   | 27-45              | 43                  | none      | 2825 | 25.0 |
| Bonfatti         | 2008 | full cream | Bobe's method                                           | Agilent Technologies | Zorbax C8          | fully porous    | 4.6           | 2.30        | 150         | 3.5                     | 30                     | 5                     | 0.50                   | 45               | 99.9%ACN /0.1%TFA          | 33-45              | 36                  | none      | 1695 | 21.4 |
| Bonizzi          | 2009 | skim milk  | 8M urea /165mM Tris /44mM Na citrate /0.3% 2ME          | Phenomenex           | Jupiter C4         | fully porous    | 4.6           | 2.30        | 250         | 5.0                     | 30                     | 20                    | 0.80                   | RT               | 99.9%ACN /0.1%TFA          | 30-50              | 40                  | ESI-Q-TOF | 2825 | 25.0 |
| Bordin           | 2001 | skim milk  | Bobe's method                                           | Vydac                | C4                 | fully porous    | 2.1           | 1.05        | 150         | 5.0                     | 30                     | 20                    | 0.25                   | 40               | 90%ACN /9.9%H2O /0.1%TFA   | 36.5-43.3          | 56                  | none      | 353  | 15.0 |
| Day              | 2015 | skim milk  | Bobe's method                                           | BioRad               | Hi-Pore RP-318 C18 | fully porous    | 4.6           | 2.30        | 250         | 5.0                     | 30                     | n.i.                  | n.i.                   | n.i.             | 99.9%ACN /0.1%TFA          | 25-50              | 40                  | ESI-LTQ   | 2825 | 25.0 |
| Frederiksen      | 2011 | skim milk  | Bobe's method                                           | Phenomenex           | Jupiter C4         | fully porous    | 2.0           | 1.00        | 250         | 5.0                     | 30                     | 2                     | 1.00                   | 35               | 99.9%ACN /0.1%TFA          | 31-45              | 40                  | ESI-MS    | 534  | 25.0 |
| Givens           | 2013 | semi-skim  | Bonizzi's method                                        | Hichrom              | ACE 5 C18          | fully porous    | 2.1           | 1.05        | 150         | 5.0                     | 30                     | 5                     | 0.20                   | 45               | 99.99%ACN /0.01% TFA       | 33-43              | 44                  | ESI-Q-TOF | 353  | 15.0 |
| Jensen           | 2012 | skim milk  | Bobe's method                                           | Phenomenex           | Jupiter C4         | fully porous    | 2.0           | 1.00        | 250         | 5.0                     | 30                     | 2                     | 1.00                   | 35               | 99.9%ACN /0.1%TFA          | 31-45              | 40                  | ESI-MS    | 534  | 25.0 |
| Poulsen          | 2016 | skim milk  | Bobe's method                                           | Phenomenex           | Jupiter C4         | fully porous    | 2.0           | 1.00        | 250         | 5.0                     | 30                     | 2                     | 1.00                   | 40               | 99.9%ACN /0.1%TFA          | 31-45              | 40                  | ESI-MS    | 534  | 25.0 |
| Ramirez-Palomino | 2014 | full cream | Bonizzi's method                                        | Phenomenex           | Onyx C18           | monolithic      | 4.6           | 2.30        | 100         | 2.0                     | 13                     | 10                    | 3.00                   | 40               | 95%ACN /4.9%H2O /0.1%TFA   | 2.5-10             | 5                   | none      | 914  | 25.0 |
| Sargeava         | 2014 | n.i.       | Bonizzi's method                                        | Phenomenex           | Widopore XP C8     | core-shell      | 2.0           | 1.00        | 100         | 3.6                     | 20                     | 2                     | 0.40                   | 50               | 99.9%ACN /0.1%FA /0.01%TFA | 25-43              | 6                   | ESI-TOF   | 173  | 13.9 |
| Vincent          | 2016 | skim milk  | Bobe's method                                           | Phenomenex           | Widopore XP C8     | core-shell      | 2.1           | 1.05        | 150         | 3.6                     | 20                     | 3                     | 0.20                   | 75               | 99.9%ACN /0.1%FA /0.02%TFA | 28-40              | 27.5                | ESI-Q-TOF | 286  | 20.8 |
| Vincent          | 2016 | skim milk  | Bobe's method                                           | Phenomenex           | Widopore XP C8     | core-shell      | 2.1           | 1.05        | 150         | 1.7                     | 20                     | 3                     | 0.20                   | 75               | 99.9%ACN /0.1%FA /0.02%TFA | 28-40              | 27.5                | ESI-Q-TOF | 286  | 44.1 |

n.i., not indicated; Vm, column interstitial volume calculated as  $V_m = \pi \cdot r^2 \cdot L \cdot W$ , where r is the column radius, L is the column length, and W=0.55 for monolithic/core-shell column, W=0.68 for fully porous column; N, column efficiency calculated as  $N = L/2d_p$ .
